# Supplementary material for: Complex self-assembly of pyrimido[4,5-d]pyrimidine nucleoside supramolecular structures
Source: Springer Nature journal article supplement (doi:10.1038/ncomms4108), 2014-01-24
Supplement: 41467_2014_BFncomms4108_MOESM1_ESM.mol [file 41467_2014_BFncomms4108_MOESM1_ESM.mol]

  ChemDraw01031410572D

 21 23  0  0  0  0  0  0  0  0999 V2000
    1.0212   -1.9475    0.0000 C   0  0  0  0  0  0  0  0  0  0  0  0
    1.3183   -1.1779    0.0000 C   0  0  0  0  0  0  0  0  0  0  0  0
    0.6781   -0.6575    0.0000 C   0  0  0  0  0  0  0  0  0  0  0  0
   -0.0146   -1.1055    0.0000 O   0  0  0  0  0  0  0  0  0  0  0  0
    0.1974   -1.9028    0.0000 C   0  0  0  0  0  0  0  0  0  0  0  0
    1.4677   -2.6379    0.0000 O   0  0  0  0  0  0  0  0  0  0  0  0
    2.1129   -0.9666    0.0000 O   0  0  0  0  0  0  0  0  0  0  0  0
   -0.3213   -2.5408    0.0000 C   0  0  0  0  0  0  0  0  0  0  0  0
   -1.4216    1.4026    0.0000 N   0  0  0  0  0  0  0  0  0  0  0  0
   -1.4216    0.5776    0.0000 C   0  0  0  0  0  0  0  0  0  0  0  0
   -0.7073    0.1636    0.0000 N   0  0  0  0  0  0  0  0  0  0  0  0
    0.0084    0.5776    0.0000 C   0  0  0  0  0  0  0  0  0  0  0  0
    0.0084    1.4026    0.0000 C   0  0  0  0  0  0  0  0  0  0  0  0
   -0.7073    1.8151    0.0000 C   0  0  0  0  0  0  0  0  0  0  0  0
    0.7227    0.1636    0.0000 N   0  0  0  0  0  0  0  0  0  0  0  0
    1.4399    0.5776    0.0000 C   0  0  0  0  0  0  0  0  0  0  0  0
    1.4399    1.4026    0.0000 N   0  0  0  0  0  0  0  0  0  0  0  0
    0.7227    1.8151    0.0000 C   0  0  0  0  0  0  0  0  0  0  0  0
   -0.7077    2.6379    0.0000 O   0  0  0  0  0  0  0  0  0  0  0  0
    0.7227    2.6157    0.0000 N   0  0  0  0  0  0  0  0  0  0  0  0
   -2.1129    0.1792    0.0000 O   0  0  0  0  0  0  0  0  0  0  0  0
  1  2  1  0      
  2  3  1  0      
  3  4  1  0      
  4  5  1  0      
  5  1  1  0      
  1  6  1  6      
  2  7  1  6      
  5  8  1  1      
  3 15  1  1      
  9 10  1  0      
 10 11  1  0      
 11 12  2  0      
 12 13  1  0      
 13 14  1  0      
  9 14  1  0      
 12 15  1  0      
 15 16  1  0      
 16 17  2  0      
 17 18  1  0      
 13 18  2  0      
 14 19  2  0      
 18 20  1  0      
 10 21  2  0      
M  END
