# Supplementary material for: Complex self-assembly of pyrimido[4,5-d]pyrimidine nucleoside supramolecular structures
Source: Springer Nature journal article supplement (doi:10.1038/ncomms4108), 2014-01-24
Supplement: 41467_2014_BFncomms4108_MOESM7_ESM.mol [file 41467_2014_BFncomms4108_MOESM7_ESM.mol]

  ChemDraw01031410572D

 32 35  0  0  0  0  0  0  0  0999 V2000
    0.3934   -0.1179    0.0000 C   0  0  0  0  0  0  0  0  0  0  0  0
    0.6570    0.6638    0.0000 C   0  0  0  0  0  0  0  0  0  0  0  0
   -0.0050    1.1561    0.0000 C   0  0  0  0  0  0  0  0  0  0  0  0
   -0.6778    0.6786    0.0000 O   0  0  0  0  0  0  0  0  0  0  0  0
   -0.4316   -0.1088    0.0000 C   0  0  0  0  0  0  0  0  0  0  0  0
    1.4418    0.9092    0.0000 O   0  0  0  0  0  0  0  0  0  0  0  0
   -0.9222   -0.7685    0.0000 C   0  0  0  0  0  0  0  0  0  0  0  0
    2.0467    0.3522    0.0000 C   0  0  0  0  0  0  0  0  0  0  0  0
    1.8668   -0.4501    0.0000 C   0  0  0  0  0  0  0  0  0  0  0  0
    2.8314    0.5976    0.0000 O   0  0  0  0  0  0  0  0  0  0  0  0
   -0.5962   -1.5234    0.0000 O   0  0  0  0  0  0  0  0  0  0  0  0
   -1.0868   -2.1831    0.0000 C   0  0  0  0  0  0  0  0  0  0  0  0
   -0.7608   -2.9379    0.0000 C   0  0  0  0  0  0  0  0  0  0  0  0
   -1.9035   -2.0881    0.0000 O   0  0  0  0  0  0  0  0  0  0  0  0
   -1.2531   -3.5999    0.0000 C   0  0  0  0  0  0  0  0  0  0  0  0
   -0.9259   -4.3573    0.0000 C   0  0  0  0  0  0  0  0  0  0  0  0
   -0.1065   -4.4527    0.0000 C   0  0  0  0  0  0  0  0  0  0  0  0
    0.3859   -3.7907    0.0000 C   0  0  0  0  0  0  0  0  0  0  0  0
    0.0587   -3.0333    0.0000 C   0  0  0  0  0  0  0  0  0  0  0  0
   -2.1402    3.2174    0.0000 N   0  0  0  0  0  0  0  0  0  0  0  0
   -2.1402    2.3923    0.0000 C   0  0  0  0  0  0  0  0  0  0  0  0
   -1.4259    1.9783    0.0000 N   0  0  0  0  0  0  0  0  0  0  0  0
   -0.7102    2.3923    0.0000 C   0  0  0  0  0  0  0  0  0  0  0  0
   -0.7102    3.2174    0.0000 C   0  0  0  0  0  0  0  0  0  0  0  0
   -1.4259    3.6299    0.0000 C   0  0  0  0  0  0  0  0  0  0  0  0
    0.0042    1.9783    0.0000 N   0  0  0  0  0  0  0  0  0  0  0  0
    0.7214    2.3923    0.0000 C   0  0  0  0  0  0  0  0  0  0  0  0
    0.7214    3.2174    0.0000 N   0  0  0  0  0  0  0  0  0  0  0  0
    0.0042    3.6299    0.0000 C   0  0  0  0  0  0  0  0  0  0  0  0
   -1.4263    4.4527    0.0000 O   0  0  0  0  0  0  0  0  0  0  0  0
    0.0042    4.4304    0.0000 N   0  0  0  0  0  0  0  0  0  0  0  0
   -2.8314    1.9940    0.0000 O   0  0  0  0  0  0  0  0  0  0  0  0
  1  2  1  0      
  2  3  1  0      
  3  4  1  0      
  4  5  1  0      
  5  1  1  0      
  2  6  1  6      
  5  7  1  1      
  3 26  1  1      
  6  8  1  0      
  8  9  1  0      
  8 10  2  0      
  7 11  1  0      
 11 12  1  0      
 12 13  1  0      
 12 14  2  0      
 13 15  2  0      
 15 16  1  0      
 16 17  2  0      
 17 18  1  0      
 18 19  2  0      
 19 13  1  0      
 20 21  1  0      
 21 22  1  0      
 22 23  2  0      
 23 24  1  0      
 24 25  1  0      
 20 25  1  0      
 23 26  1  0      
 26 27  1  0      
 27 28  2  0      
 28 29  1  0      
 24 29  2  0      
 25 30  2  0      
 29 31  1  0      
 21 32  2  0      
M  END
